# Supplementary material
Source: MDPI journal article supplement (https://www.mdpi.com/1424-8247/15/10/1177)
Supplement: s1 [file s1]

## **Supplementary File I**

**List of content**

**Table S1. Primer sequences of RNAs for qRT-PCR**

**Table S2. Cell numbers of each cluster**



**Table S1. Primer sequences of RNAs for qRT-PCR**

| Gene Name | Species | Sequence                                                       |
|-----------|---------|----------------------------------------------------------------|
| GAPDH     | Human   | F:5' CTGGGCTACACTGAGCACC 3'<br>R:5' AAGTGGTCGTTGAGGGCAATG 3'   |
| HSPB1     | Human   | F:5' CAGGACGAGCATGGCTACAT 3'<br>R:5' TGATCTCGTTGGACTGCGTG 3'   |
| FTH1      | Human   | F:5' CCCCCATTTGTGTGACTTCAT 3'<br>R:5' GCCCGAGGCTTAGCTTTCATT 3' |
| CD44      | Human   | F:5' CACACCCTCCCCTCATTCAC 3'<br>R:5' TGGATGGCTGGTATGAGCTG 3'   |
| SAT1      | Human   | F:5' CCTGACTGAGAAGAGGACGC 3'<br>R:5' TGATCAGCCGCAGTATGTCA 3'   |
| ZFP36     | Human   | F:5' ACTGCCATCTACGAGAGCCT 3'<br>R:5' ACTAGGCTGGTGGAGCGG 3'     |



**Table S2. Cell numbers of each cluster**

| <b>cluster</b> | <b>Oligo</b> | <b>Astro</b> | <b>OPC</b> | <b>Neuron</b> | <b>UnID</b> | <b>Mg</b> | <b>Doublet</b> | <b>Endo</b> |
|----------------|--------------|--------------|------------|---------------|-------------|-----------|----------------|-------------|
| AD1-AD2        | 1956         | 96           | 32         | 99            | 540         | 21        | 279            | 5           |
| AD3-AD4        | 2075         | 235          | 57         | 114           | 26          | 87        | 9              | 2           |
| AD5-AD6        | 624          | 141          | 90         | 36            | 48          | 64        | 7              | 30          |
| HC1-HC2        | 409          | 166          | 88         | 68            | 279         | 54        | 47             | 11          |
| HC3-HC4        | 1431         | 853          | 427        | 124           | 10          | 142       | 24             | 32          |
| HC5-HC6        | 937          | 680          | 384        | 215           | 22          | 81        | 39             | 18          |

HC: healthy controls. AD: Alzheimer's disease. Astro: astrocytes. UnID: unidentified cells. Oligo: oligodendrocytes. Endo: endothelial cells. Mg: microglia.
